# Supplementary material for: Restoration of correct βIVS2-654-globin mRNA splicing and HbA production by engineered U7 snRNA in β-thalassaemia/HbE erythroid cells
Source: PubMed Central journal article supplement (PMC6529457; doi:10.1038/s41598-019-43964-3), 2019-05-21
Supplement: 41598_2019_43964_MOESM1_ESM.pdf [file 41598_2019_43964_MOESM1_ESM.pdf]

**Restoration of correct  $\beta^{IVSII-654}$ -globin mRNA splicing and HbA production by engineered U7 snRNA in  $\beta$ -thalassaemia/HbE erythroid cells.**

Tiwaporn Nualkaew<sup>1,+</sup>, Natee Jearawiriyapaisarn<sup>1,+</sup>, Suradej Hongeng<sup>2</sup>, Suthat Fucharoen<sup>1</sup>, Ryszard Kole<sup>3</sup>, Saovaros Svasti<sup>1,4,\*</sup>

<sup>1</sup>Thalassemia Research Center, Institute of Molecular Biosciences, Mahidol University, Nakhon Pathom, Thailand

<sup>2</sup>Departments of Pediatrics, Faculty of Medicine Ramathibodi Hospital, Mahidol University, Bangkok, Thailand

<sup>3</sup>Ercole Consulting, Chapel Hill, NC 27514, USA

<sup>4</sup>Department of Biochemistry, Faculty of Science, Mahidol University, Bangkok, Thailand

<sup>+</sup> These authors contributed equally to this study.

**\* Corresponding author:**

Saovaros Svasti, Ph.D.

Thalassemia Research Center, Institute of Molecular Biosciences, Mahidol University, 25/25 Phuttamonthon 4 Road, Salaya, Nakhon Pathom 73170, Thailand. Tel: +66-2889-2557, Fax: +66-2889-2559,

E-mail: saovaros.sva@mahidol.ac.th, stssv@yahoo.com

**Word count:** abstract 196 words, methods 1,054 words, main text 2,544 words

**Number of figure:** 4

**Number of supplement figure:** 2

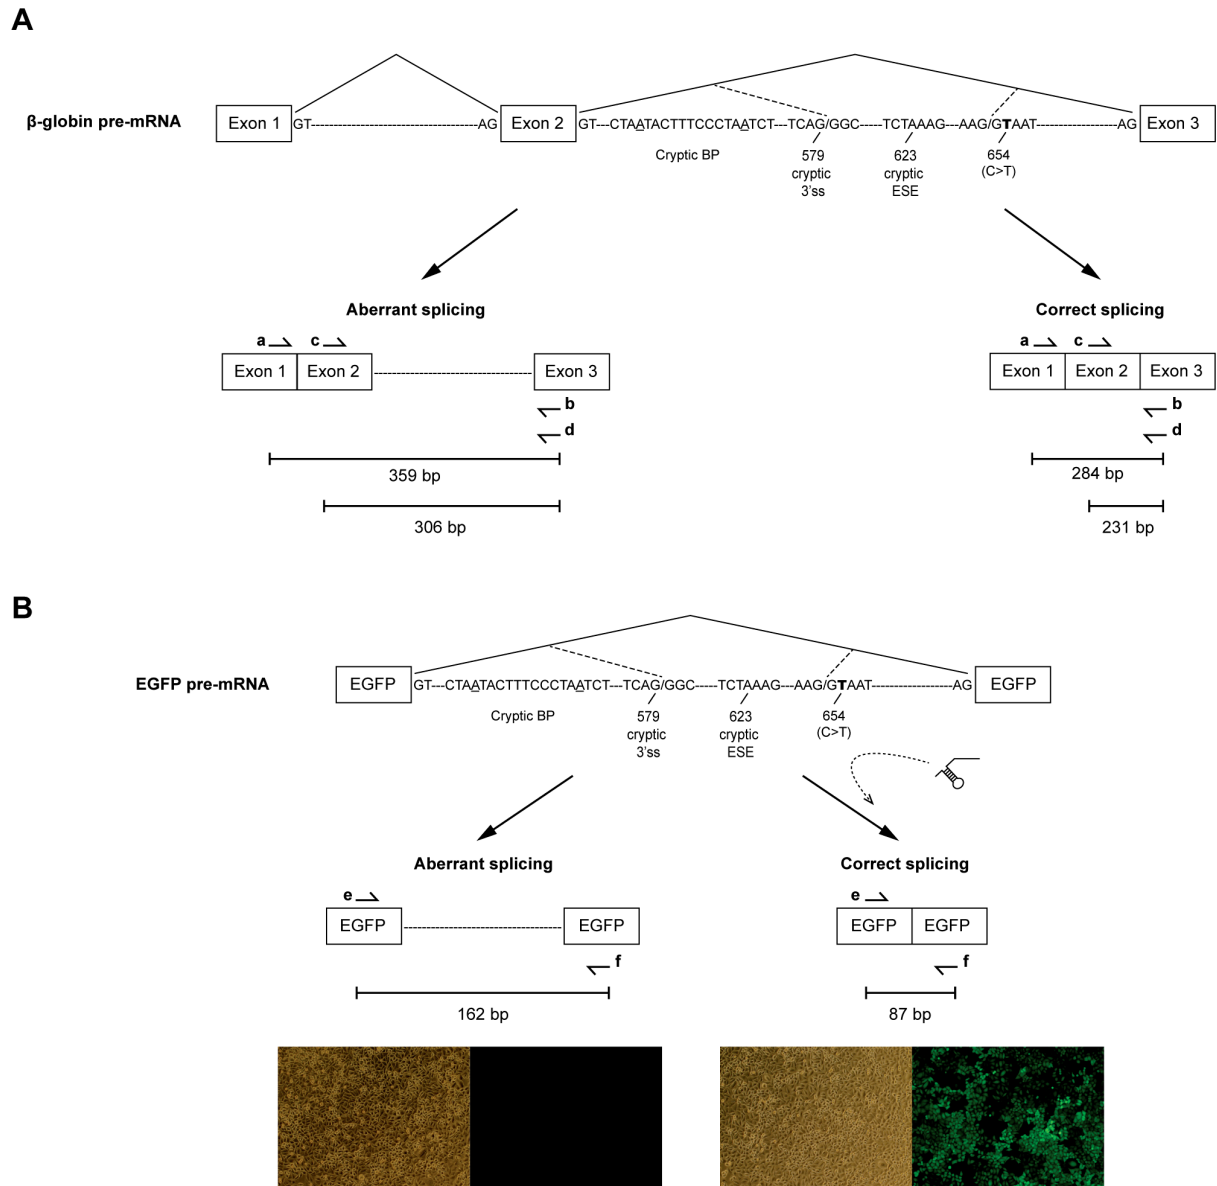

**Figure S1. Splicing of human  $\beta^{\text{IVS2-654}}$ -globin pre-mRNA and EGFP-IVS2-654 pre-mRNA.** (A) Splicing pathway of human  $\beta^{\text{IVS2-654}}$ -globin pre-mRNA. Aberrant  $\beta$ -globin pre-mRNA splicing resulted in retention a part of intron 2 into mature  $\beta$ -globin mRNA (left). Correct  $\beta$ -globin pre-mRNA splicing resulted in functional protein of  $\beta$ -globin chain (right). The sequence of splicing elements in intron 2 are shown. (B) Splicing pathway of EGFP pre-mRNA splicing in HeLa EGFP-654 cells. Interruption of EGFP coding sequence by the IVS2-654  $\beta$ -globin intron 2 prevents EGFP expression. Correction of aberrant EGFP pre-mRNA splicing by engineered U7 snRNA restores EGFP expression provide a positive readout for antisense activity. Solid lines represent correct splicing and dashed lines represent aberrant splicing. Primers, half-headed arrows.

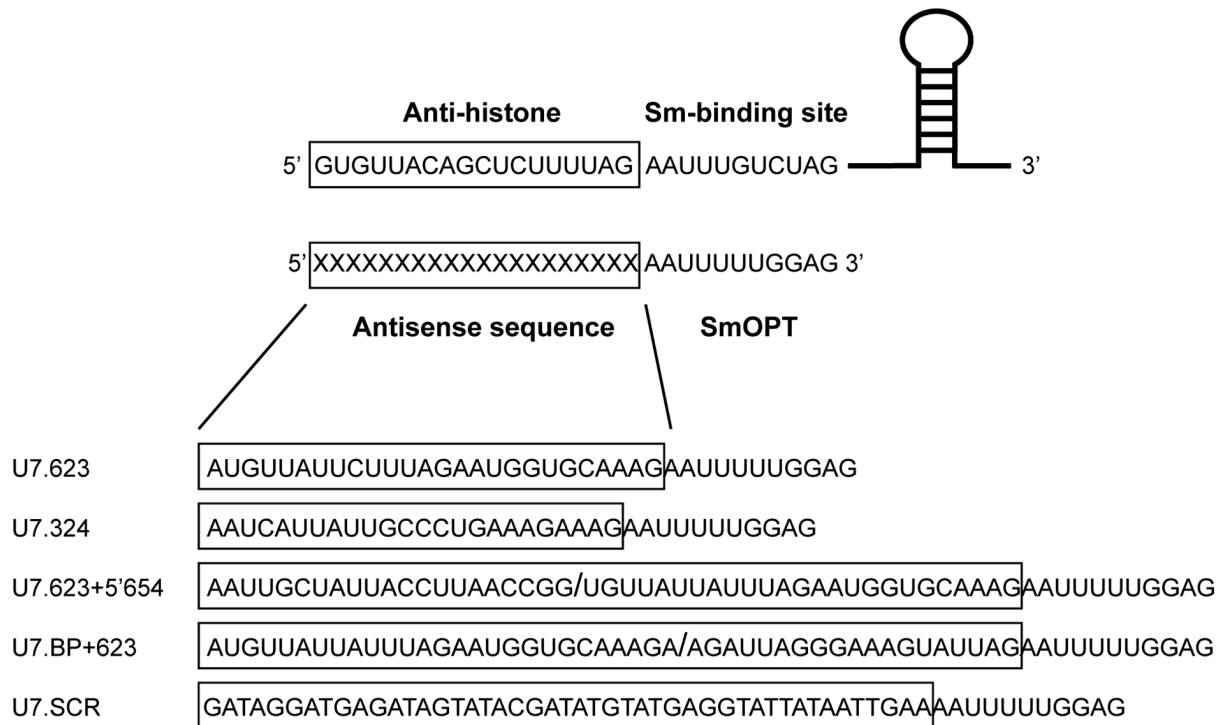

**Figure S2: Structure of Modified antisense U7 snRNA.** The anti-histone sequence, first 18 nucleotides, of 62-nt long U7 snRNA is replaced with antisense sequence and the Sm-binding site (AAUUUGUCUAG) is replaced with the consensus Sm-binding sequence derived from the major spliceosomal snRNPs (SmOPT; AAUUUUUGGAG). Antisense sequences are indicated in boxes.
